# Supplementary material for: High-temperature solvent-free synthesis of low-molecular-weight organogelators consisting of starch-derived 1,5-anhydro-d-glucitol coupled with fatty acids
Source: Royal Society of Chemistry journal article supplement (doi:10.1039/d3ra01328f), 2023-01-01
Supplement: d3ra01328f1.pdf [file d3ra01328f1.pdf]

Supporting information

High-temperature solvent-free synthesis of low-molecular-weight  
organogelators consisting of starch-derived 1,5-anhydro-D-  
glucitol coupled with fatty acids

Shiro Komba\* and Rika Iwaura

Food Research Institute, National Agriculture and Food Research Organization,  
2-1-12, Kannondai, Tsukuba, Ibaraki 305-8642, Japan.

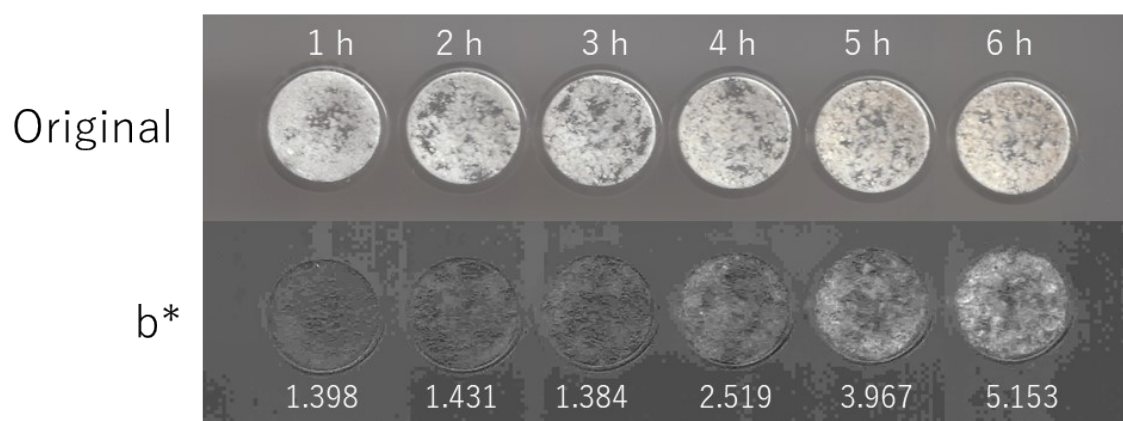

**Fig. 1s** Scan image and converted  $b^*$  stack image for measuring yellowness (whiteness) shown in (C) of Fig. 2.

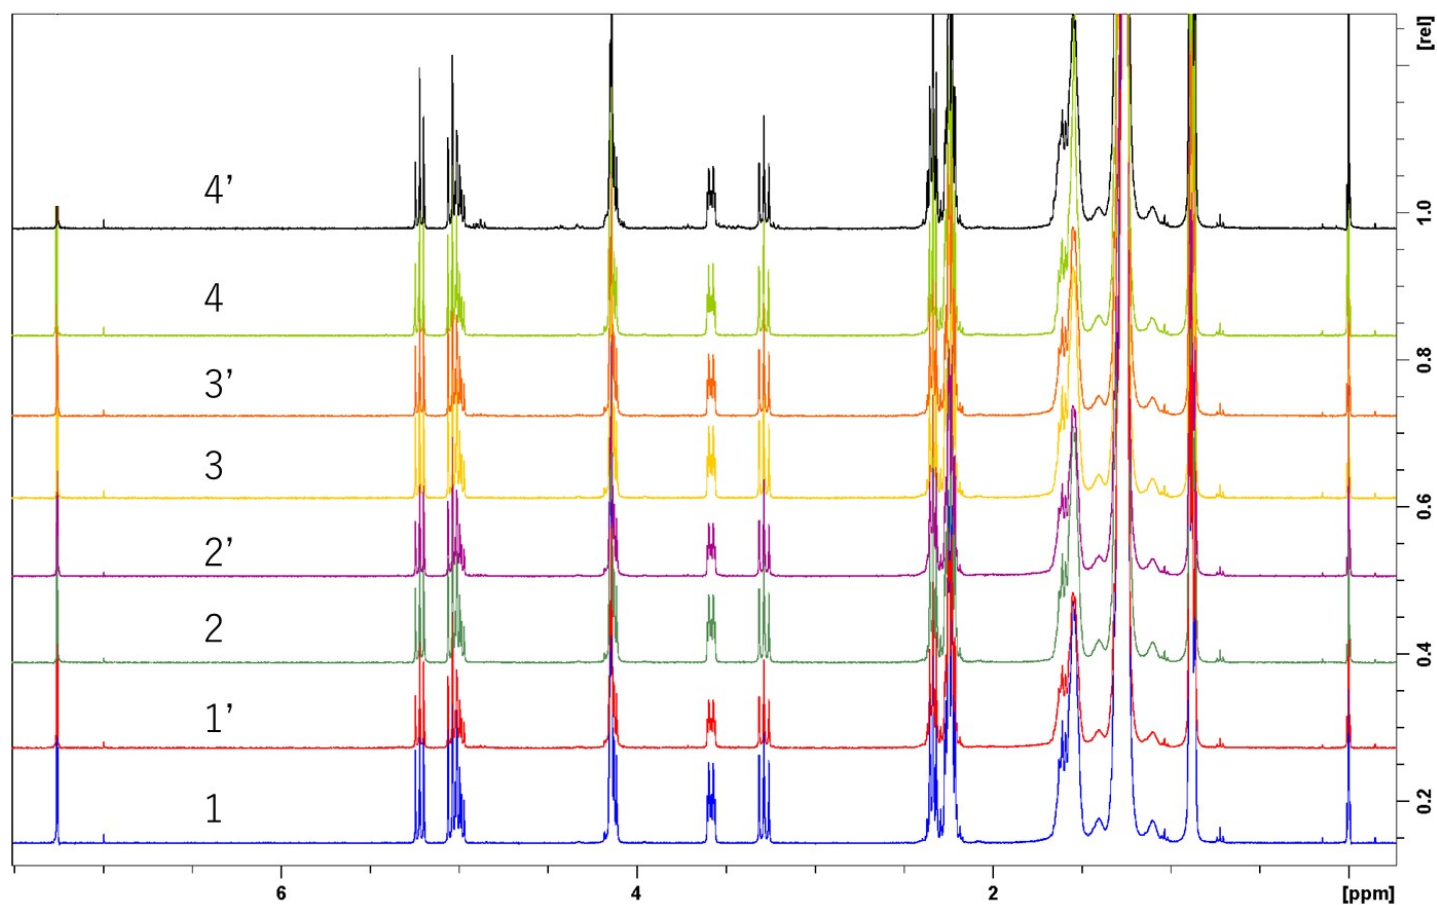

**Fig. 2s**  $^1\text{H-NMR}$  spectra of each sample of C16AG in  $\text{CDCl}_3$  ( $\text{Me}_4\text{Si} = 0$  ppm). 1:  $\text{K}_2\text{CO}_3$ , primary crystal (Table 1, entry 1), 1':  $\text{K}_2\text{CO}_3$ , secondary crystal (Table 1, entry 1'), 2:  $\text{NaOH}$ , primary crystal (Table 1, entry 2), 2':  $\text{NaOH}$ , secondary crystal (Table 1, entry 2'), 3:  $\text{KOH}$ , primary crystal (Table 1, entry 3), 3':  $\text{KOH}$ , secondary crystal (Table 1, entry 3'), 4: noncatalyst, primary crystal (Table 1, entry 4), 4': noncatalyst, secondary crystal (Table 1, entry 4').

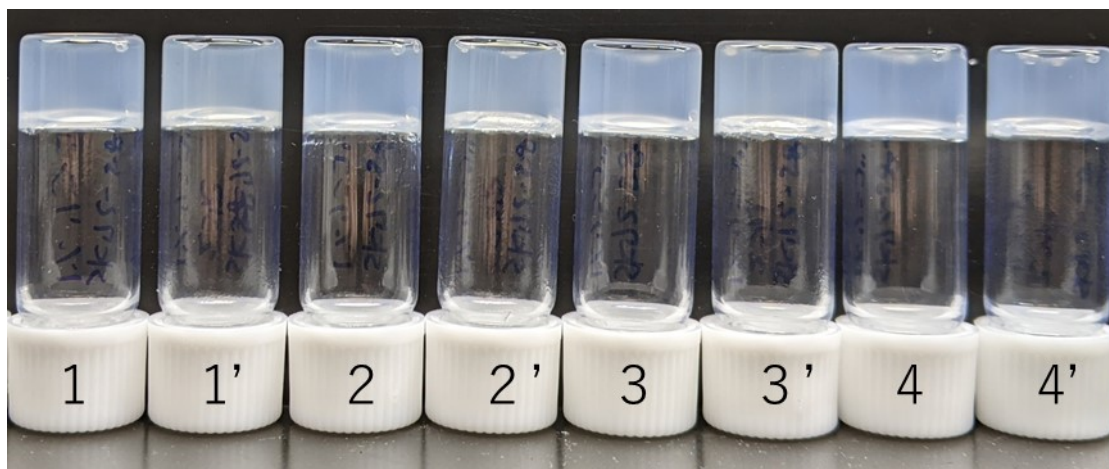

**Fig. 3s** Appearance of gels (1 wt % gel of each sample in diisostearyl malate) in each entry shown in Table 1. None of the gels flowed down when inverted.

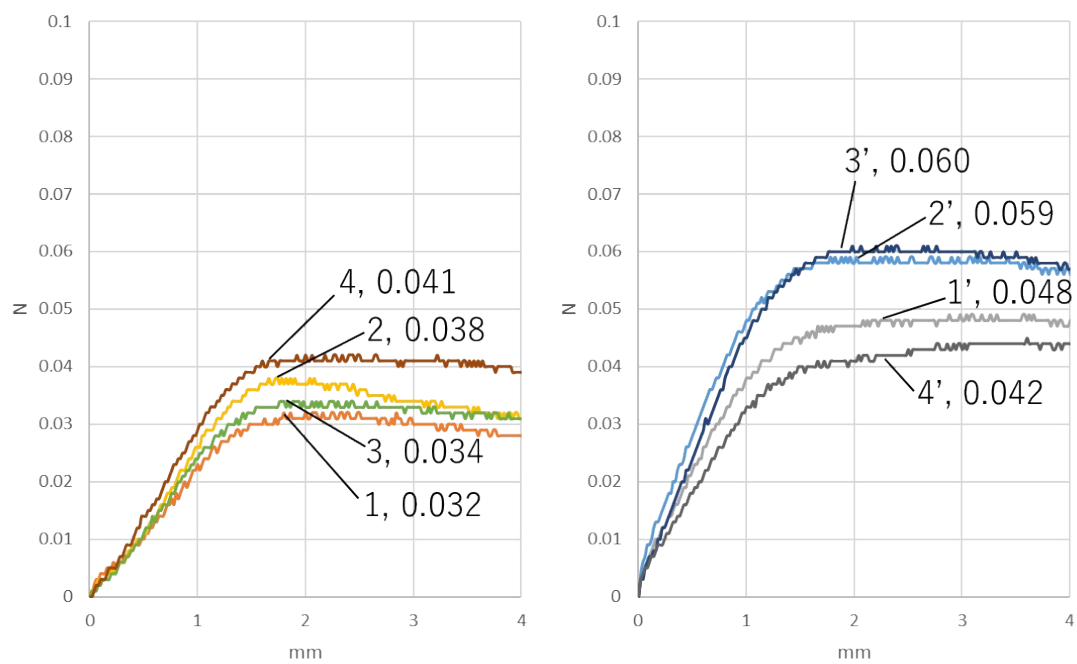

**Fig. 4s** Gel hardness measurement results for each entry are shown in Table 1.

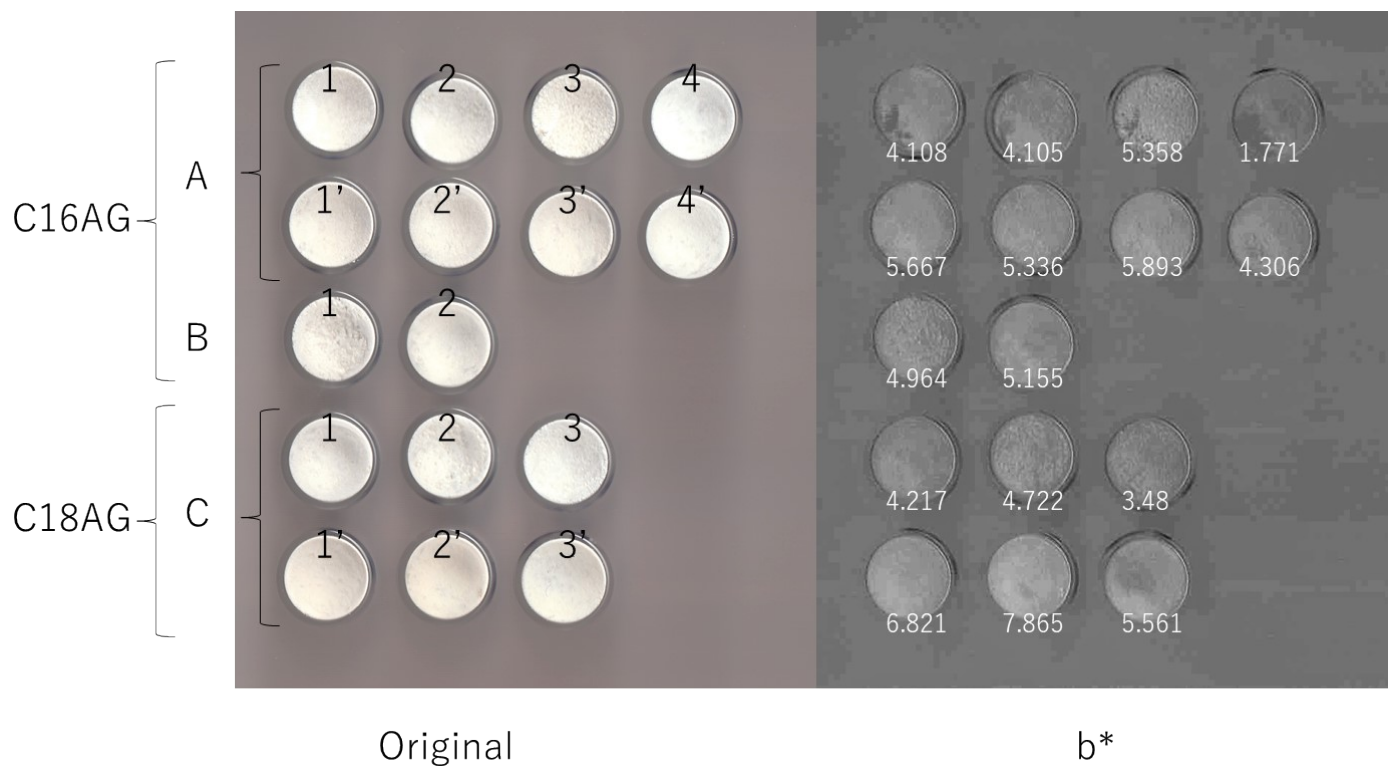

**Fig. 5s** The scan image and converted b\* stack image of each sample. A: Scan image and converted b\* stack image for measuring yellowness (whiteness) shown in Table 1. B: Scan image and converted b\* stack image for measuring the yellowness (whiteness) of the compounds shown in Fig. 4. C: Scan image and converted b\* stack image for measuring yellowness (whiteness) shown in Table 2.

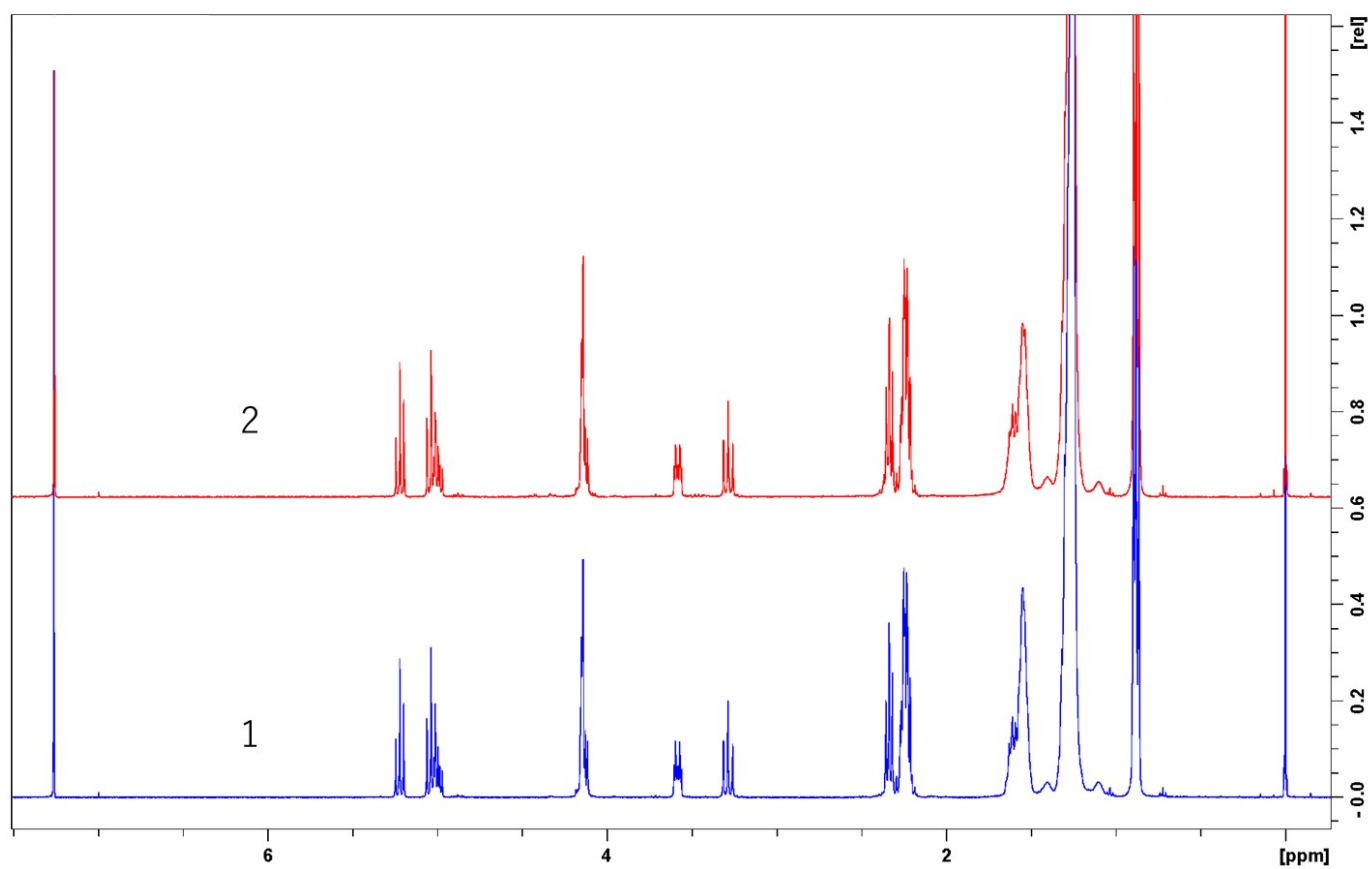

**Fig. 6s**  $^1\text{H-NMR}$  spectra of each sample of C16AG in  $\text{CDCl}_3$  ( $\text{Me}_4\text{Si} = 0 \text{ ppm}$ ). 1:  $\text{K}_2\text{CO}_3$ , (Fig. 4, entry 1), 2:  $\text{NaOH}$ , (Fig. 4, entry 2).

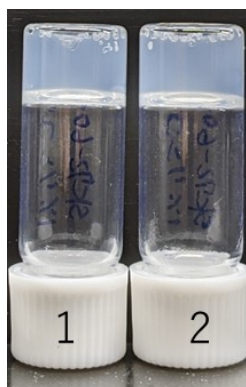

**Fig. 7s** Appearance of gels (1 wt % gel of each sample in diisostearyl malate) in both entries shown in Fig. 4. Both gels did not flow down when inverted.



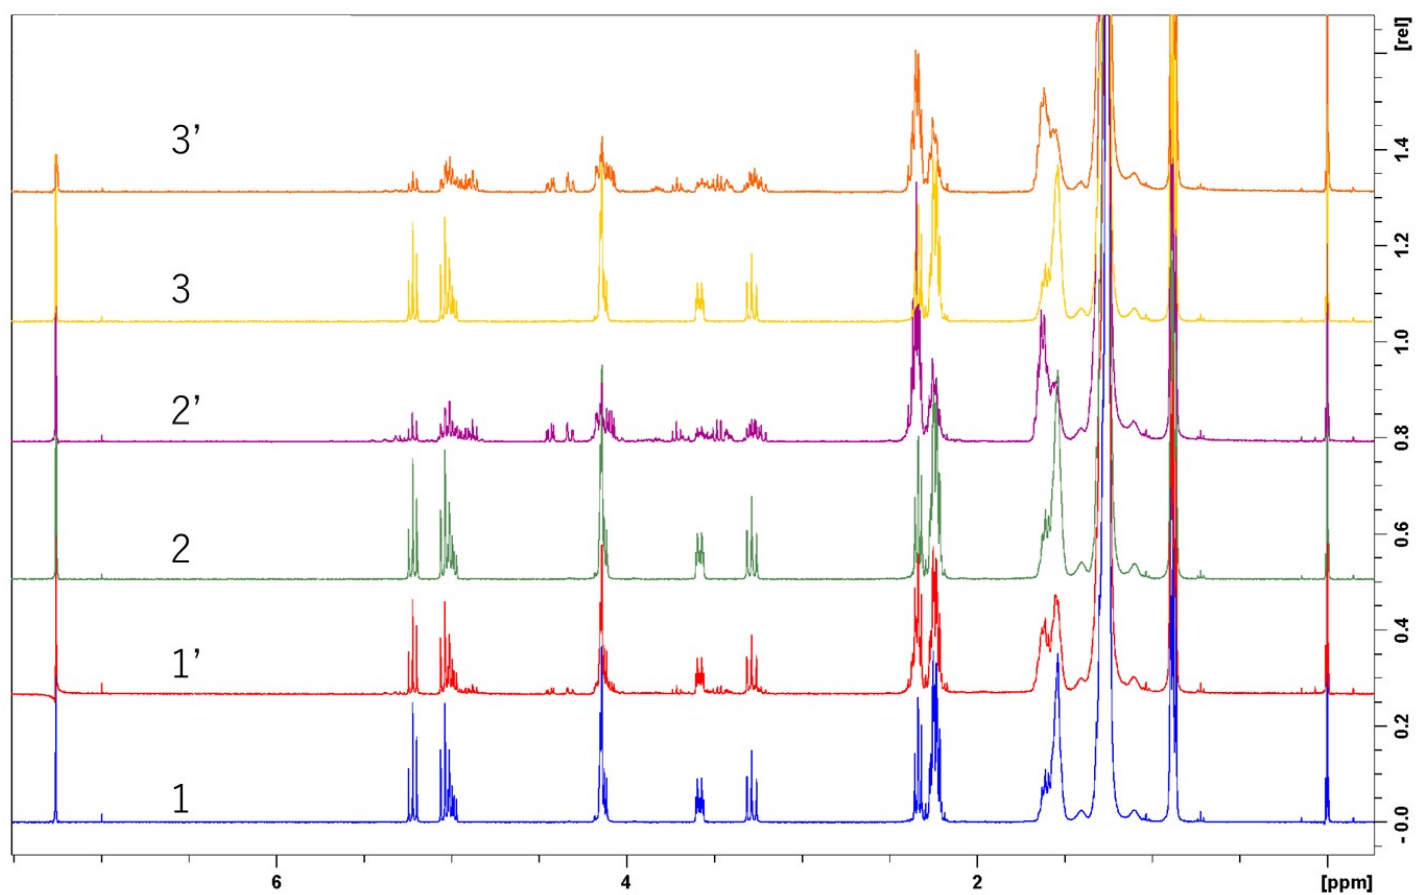

**Fig. 8s**  $^1\text{H}$ -NMR spectra of each sample of C18AG in  $\text{CDCl}_3$  ( $\text{Me}_4\text{Si} = 0$  ppm). 1:  $\text{K}_2\text{CO}_3$ , primary crystal (Table 2, entry 1), 1':  $\text{K}_2\text{CO}_3$ , secondary crystal (Table 2, entry 1'), 2:  $\text{NaOH}$ , primary crystal (Table 2, entry 2), 2':  $\text{NaOH}$ , secondary crystal (Table 2, entry 2'), 3: noncatalyst, primary crystal (Table 2, entry 3), 3': noncatalyst, secondary crystal (Table 2, entry 3').

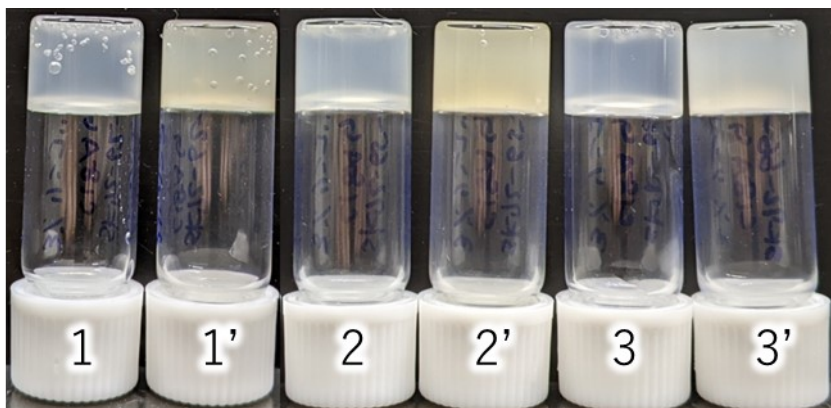

**Fig. 9s** Appearance of the gels (3 wt % gel of each sample in diisostearyl malate) in each entry shown in Table 2. None of the gels flowed down when inverted.

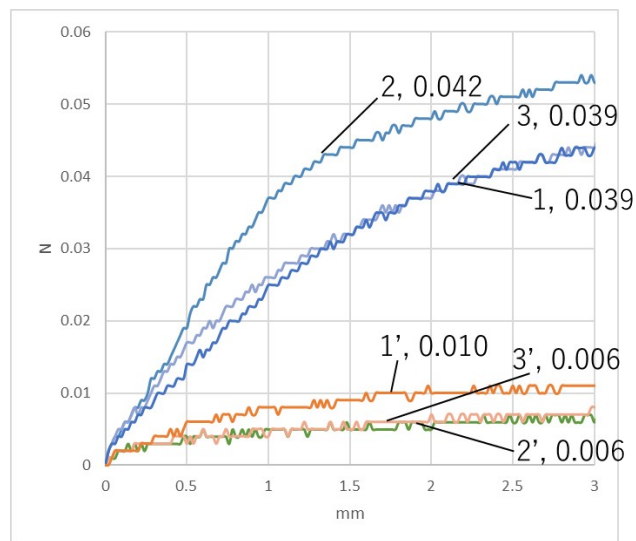

**Fig. 10s** Gel hardness measurement results for each entry are shown in Table 2.

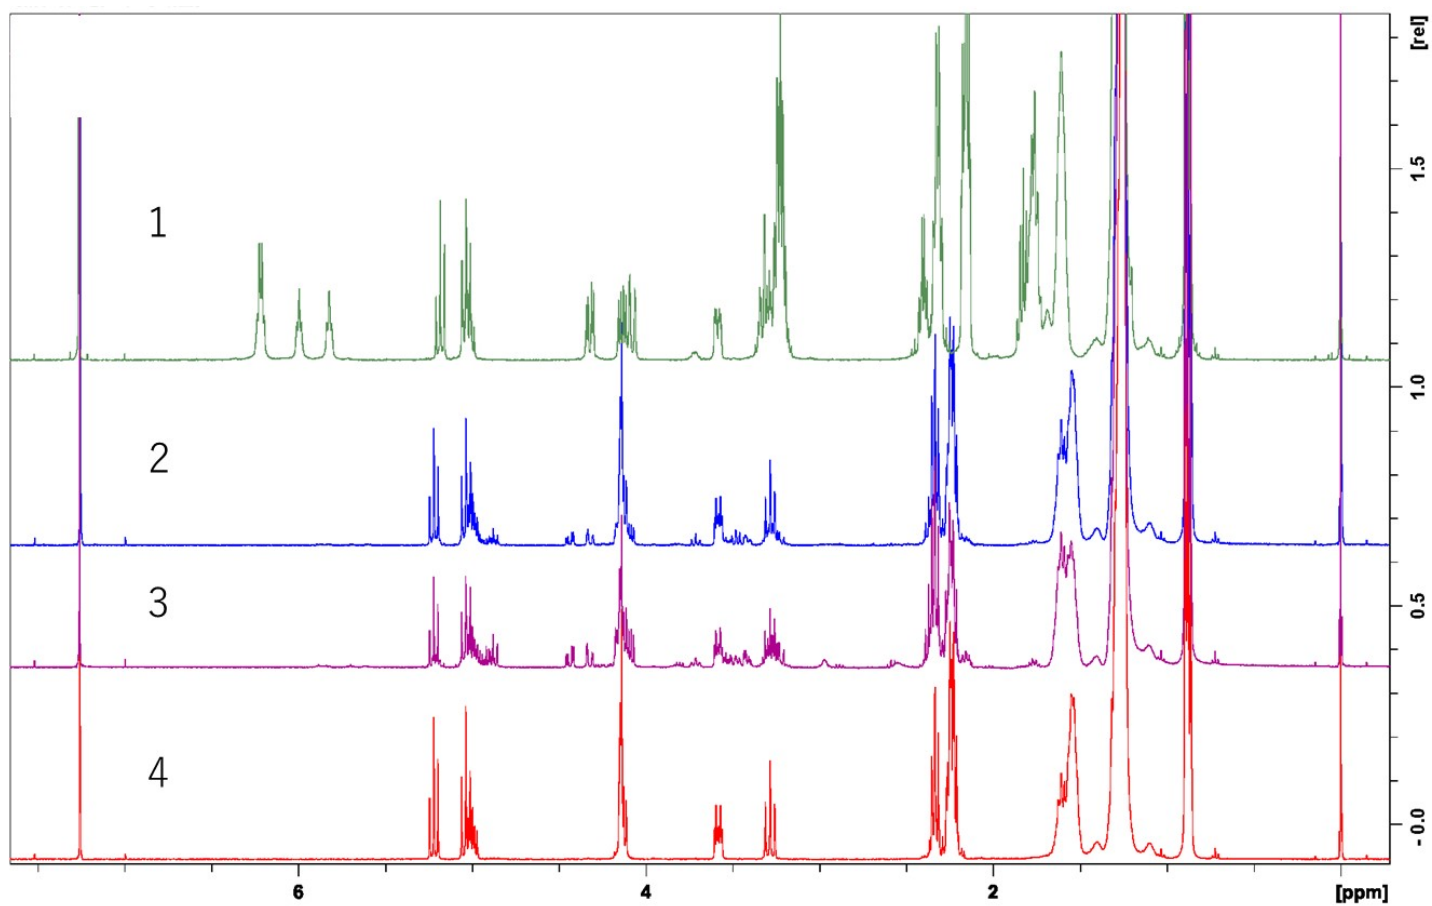

**Fig. 11s**  $^1\text{H-NMR}$  spectra of each sample in  $\text{CDCl}_3$  ( $\text{Me}_4\text{Si} = 0 \text{ ppm}$ ). 1:  $\text{C}_{16}\text{GABA-AG}$  standard, 2: Reaction products of 1,5-AG and  $\text{C}_{16}\text{GABA}$  by thermal synthesis (with base catalyst), 3: Reaction products of 1,5-AG and  $\text{C}_{16}\text{GABA}$  by thermal synthesis (without base catalyst), 4:  $\text{C}_{16}\text{AG}$  standard. In both entries 2 and 3,  $\text{C}_{16}\text{AG}$  was synthesized instead of  $\text{C}_{16}\text{GABA-AG}$ .

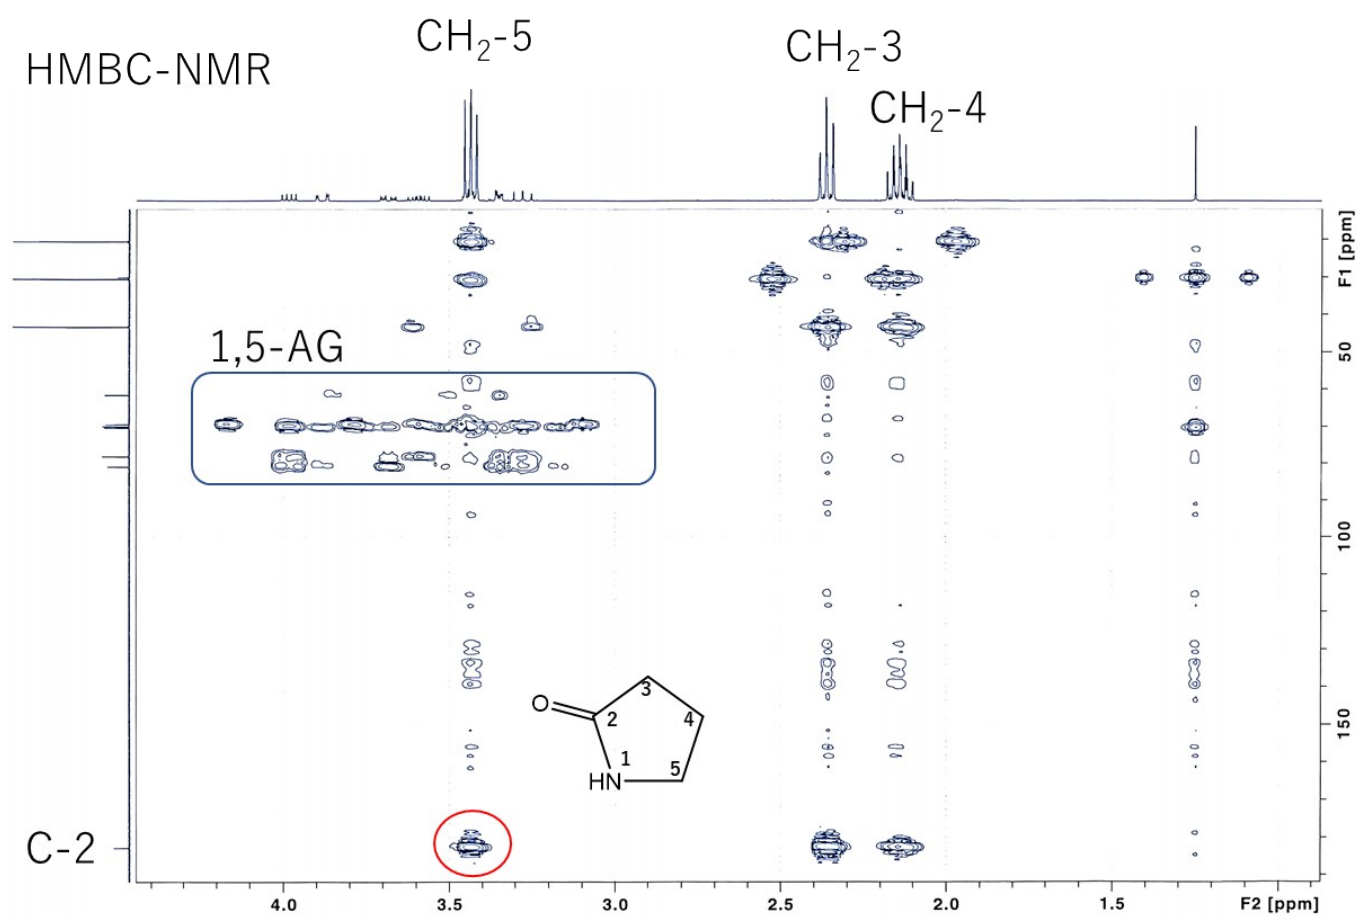

**Fig. 12s** HMBC-NMR spectra of the reaction product of 1,5-AG and GABA by thermal synthesis in D<sub>2</sub>O (*t*BuOH = 1.25 ppm, 30.29 ppm). The cross peaks of CH<sub>2</sub>-5 and C-2 indicate intramolecular cyclization.
